# Supplementary material for: Metals in microplastics: determining which are additive, adsorbed, and bioavailable
Source: Royal Society of Chemistry journal article supplement (doi:10.1039/d1em00017a), 2021-01-01
Supplement: d1em00017a1.pdf [file d1em00017a1.pdf]

## Supporting information:

# Metals in microplastics: determining which are additive, adsorbed, and bioavailable

Charlotte Catrouillet<sup>a\*</sup>, Mélanie Davranche<sup>a</sup>, Imane Khatib<sup>a</sup>, Corentin Fauny<sup>a</sup>, Aurélie Wahl<sup>a</sup>,  
Julien Gigault<sup>a,b\*</sup>.

<sup>a</sup>*Univ. Rennes, CNRS, Géosciences Rennes - UMR 6118, F-35000 Rennes, France*

<sup>b</sup>*TAKUVIK CNRS/ULaval, UMI3376, Université Laval, Quebec City, QC, Canada*

\*Corresponding authors: [julien.gigault@takuvik.ulaval.ca](mailto:julien.gigault@takuvik.ulaval.ca) and [charlotte.catrouillet@univ-rennes1.fr](mailto:charlotte.catrouillet@univ-rennes1.fr)

## Section S1: Materials and methods

Quantitative analyses were performed using a conventional external calibration procedure (7 external standard multi-element solutions were purchased from Inorganic Venture, USA). A 300 ppb mixed solution of rhodium and rhenium was injected with the sample in-line in the nebulizer. This solution was used as an internal standard for all measured samples, to correct any instrumental drift and matrix effects. Calibration curves were calculated based on the intensity ratios between the internal standard and the analysed elements. An SLRS-6 water standard was used to check the accuracy of the measurement procedure.

The matrix of reference materials (ERM-EC 680 and ERM-EC 681) is composed of polyethylene supplemented with various concentrations of inorganic additives including As, Cd, Cr, Pb and Zn. Concentrations were validated for As (-0.56 and 9.26% of error), Cd (-1.04 and 0.82%), Cr (-0.8 and 3.16% of error), Pb (10.19 and 3.54% of error) and Zn (-0.68 and -7.75% of error).

Table S1: Quantification limit of the ICP-MS.

| Element | Isotope | Mode   | <1000 | < 100 ppb | < 10 ppb | <1 ppb | <0,5ppb | < 0,1 ppb |
|---------|---------|--------|-------|-----------|----------|--------|---------|-----------|
|         |         |        | ppb   | ppb       | ppb      | ppb    | ppb     | ppb       |
| Al      | 27      | No Gas | 3%    | 5%        | 5%       | 5%     | 5%      | 10%       |
| V       | 51      | He     | 3%    | 5%        | 5%       | 5%     | 5%      | 10%       |
| Cr      | 52      | He     | 3%    | 5%        | 5%       | 5%     | 5%      | 10%       |
| Cr      | 53      | He     | 3%    | 5%        | 5%       | 5%     | 5%      | 10%       |
| Mn      | 55      | He     |       | 3%        | 3%       | 5%     | 5%      | 10%       |
| Fe      | 56      | He     | 3%    | 5%        | 5%       | 10%    |         |           |
| Fe      | 57      | He     | 3%    | 5%        | 5%       | 10%    |         |           |
| Co      | 59      | He     |       | 3%        | 3%       | 5%     | 5%      | 10%       |
| Ni      | 60      | He     |       | 3%        | 3%       | 5%     | 5%      | 10%       |
| Ni      | 62      | He     |       | 3%        | 3%       | 5%     | 5%      | 10%       |
| Cu      | 65      | He     | 3%    | 3%        | 3%       | 5%     | 5%      | 10%       |
| Zn      | 66      | No Gas |       | 3%        | 3%       | 5%     | 5%      | 10%       |
| Zn      | 66      | He     | 3%    | 3%        | 3%       | 5%     | 5%      | 10%       |
| As      | 75      | He     |       | 3%        | 3%       | 5%     | 5%      | 10%       |
| Cd      | 111     | No Gas |       | 3%        | 3%       | 5%     | 5%      | 10%       |
| Ba      | 138     | No Gas | 3%    | 3%        | 3%       | 3%     | 5%      | 10%       |
| Pb      | 208     | No Gas |       |           | 3%       | 3%     | 5%      | 10%       |

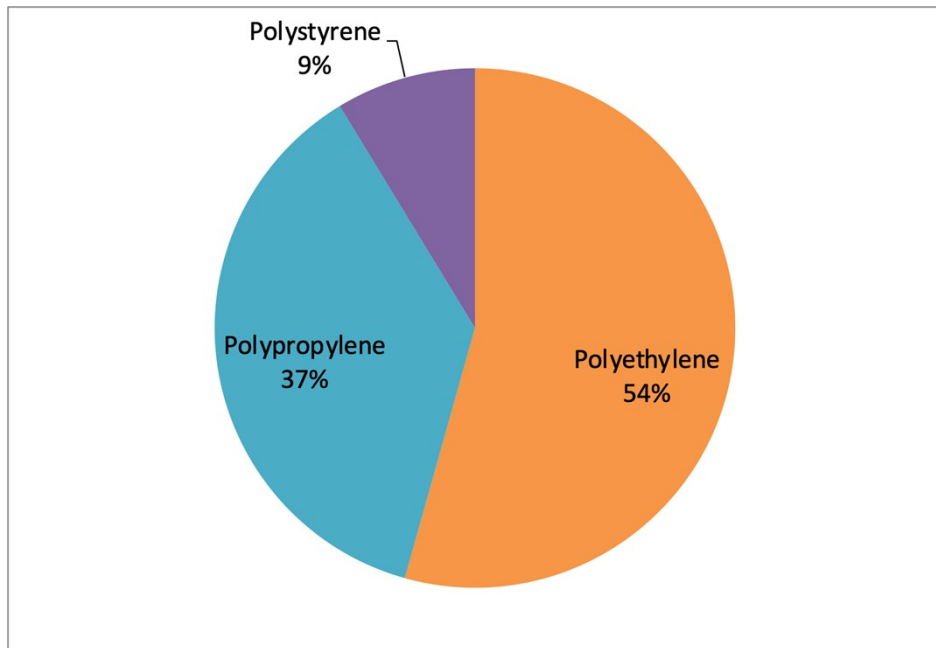

*Figure S1: Distribution of the microplastics' composition analyzed by FTIR.*

## **Section S2: Identification of the elements nature**

Due to their similar chemical behaviour, Fe and Mn concentrations in water are usually related by a linear relationship. Interestingly, Fe and Mn also show this linear relationship in all the coloured microplastics, except for the grey and black microplastics (Figure S1a). There are three factors that lead us to state that Fe and Mn are present as sorbent elements in all samples, except for the grey and black sample: (i) to our knowledge, Fe is used as an additive only as an inorganic pigment (Table S1 and 2), (ii) Mn is used only as an inorganic pigment for the grey colour (Table S1 and 2), and (iii) Fe and Mn concentrations are linearly linked. Similarly, a linear relationship is highlighted between Al and Mn concentrations, except for the orange microplastics (Figure S1b and c). Both microplastics samples (grey and black for Mn and orange for Al) could, therefore, be additives. Comparing the S values of Al, Mn and Fe (Figure S2a)), those two samples present high S values. We can thus identify elements as additives based on their S values.

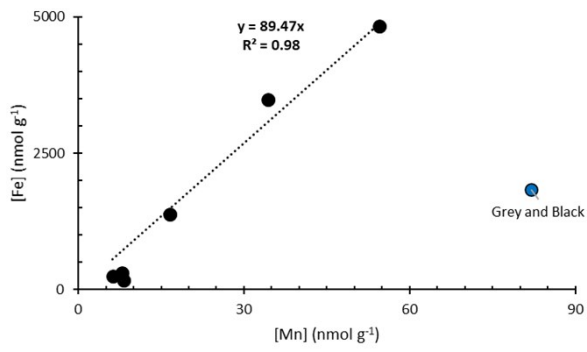

a)

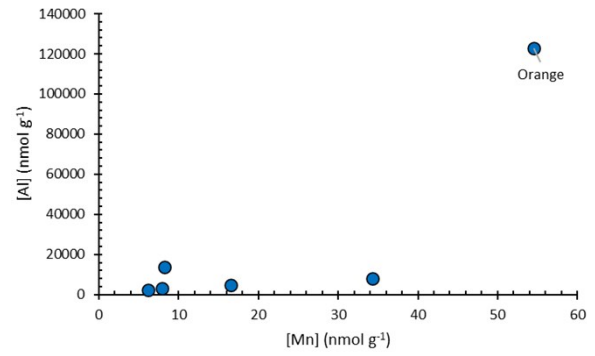

b)

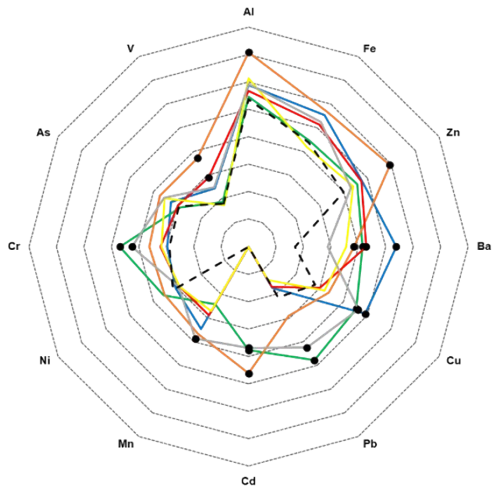

c)

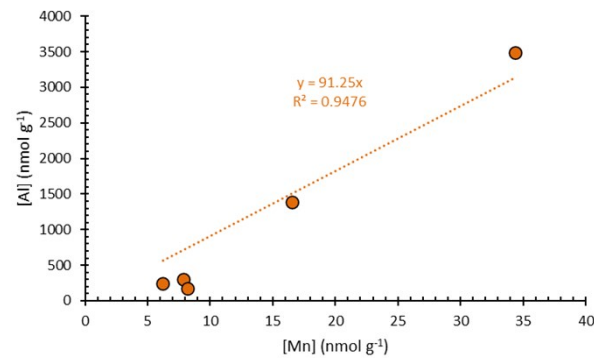

d)

Figure S2: Linear relationship between (a) Fe and Mn and (b) Al and Mn concentrations with the orange microplastics and (c) without the orange microplastics. d) S values obtained from acidic leaching and digestion for Al, Fe, Zn, Ba, Cu, Pb, Cd, Mn, Ni, Cr, As and V elements; high S values indicate these are additives in microplastics.

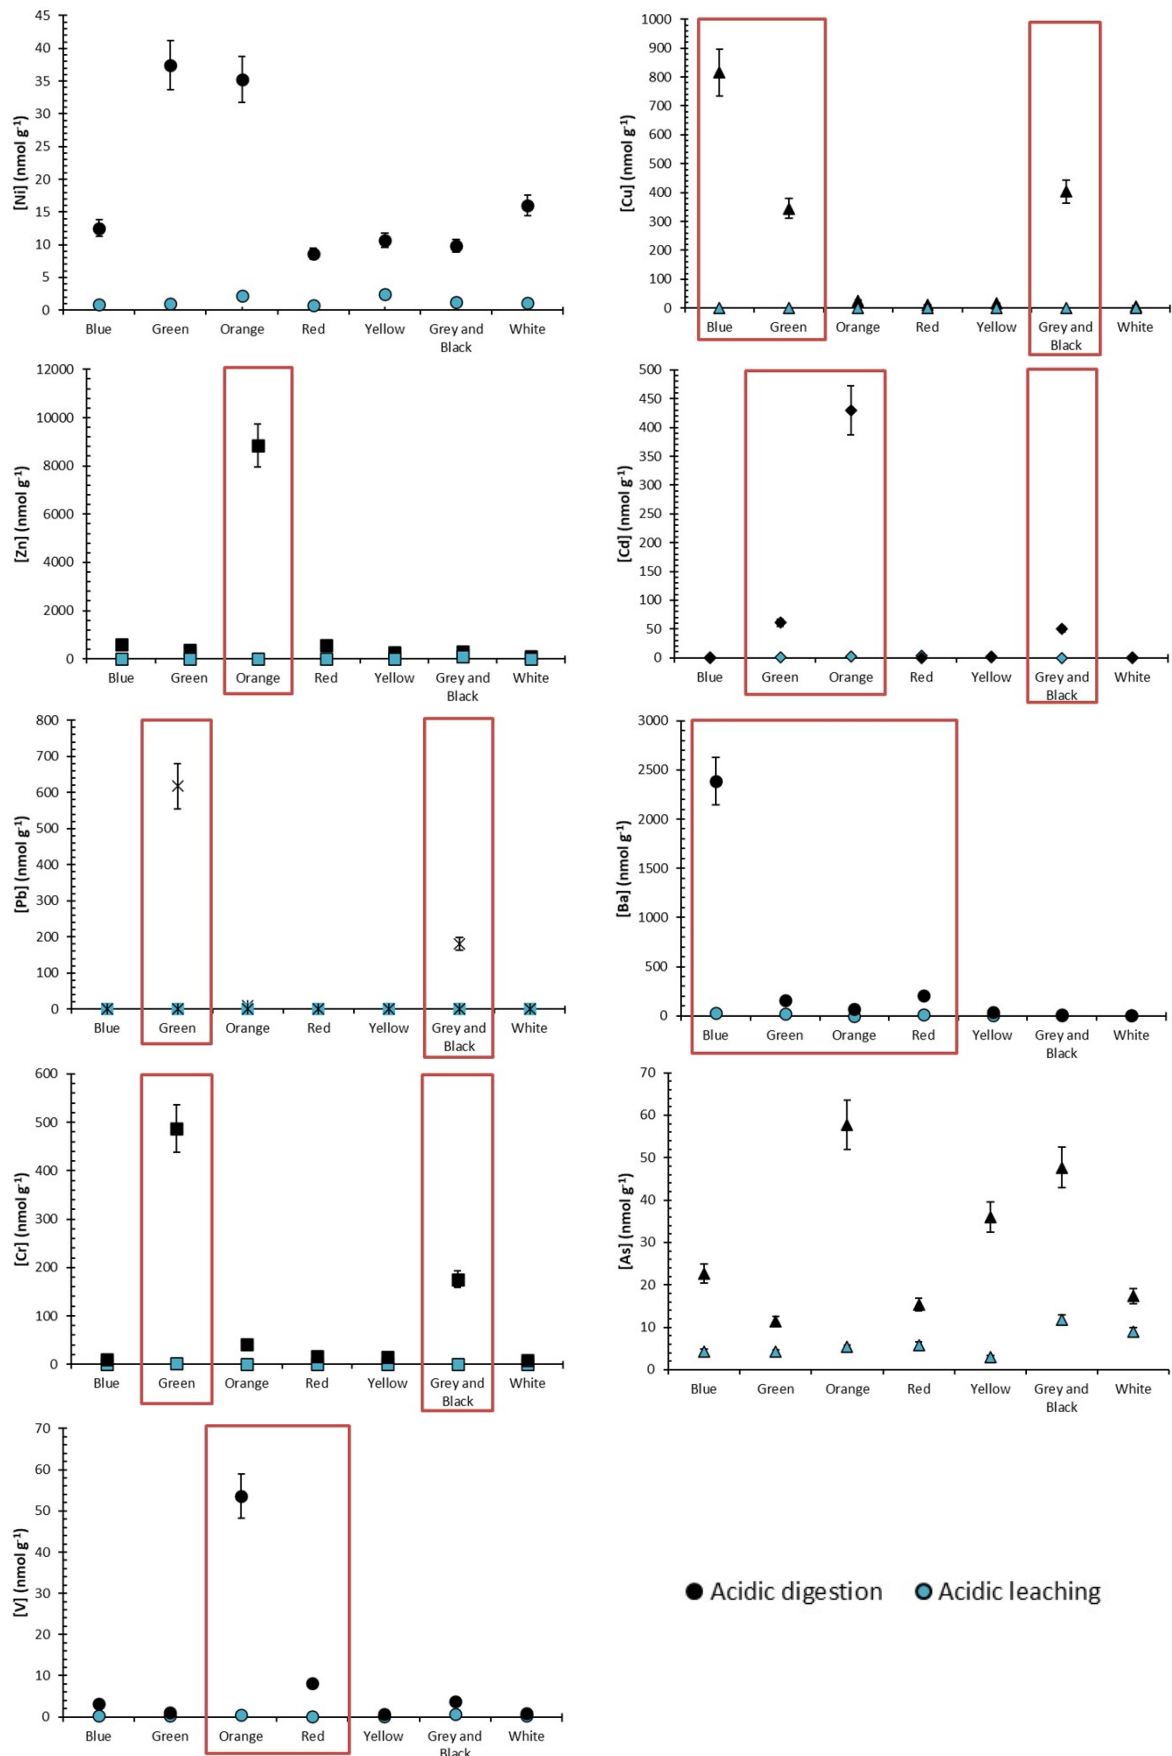

Figure S3: Element concentrations measured in the acidic leachate after total acidic digestion. Red rectangles highlight the high differences in extraction concentrations.

## Section S3: Tables

Table S2: Summary of elements that are used as pigments. Most of the data comes from the Internet site <https://colourlex.com/pigments/pigments-colour/>.

| Colour         | Name of the pigment                             | Composition                                                                                                                    |
|----------------|-------------------------------------------------|--------------------------------------------------------------------------------------------------------------------------------|
| Blue           | Han Blue                                        | $\text{YIn}_{1-x}\text{Mn}_x\text{O}_3$                                                                                        |
|                | Egyptian blue                                   | $\text{BaCuSi}_2\text{O}_6$                                                                                                    |
|                | Blue Verditer                                   | $\text{CaCuSi}_4\text{O}_{10}$                                                                                                 |
|                | Manganese Blue                                  | $2\text{CuCO}_3 \cdot \text{Cu}(\text{OH})_2$                                                                                  |
|                | Vivianite                                       | $\text{BaMnO}_4 \cdot \text{BaSO}_4$                                                                                           |
|                | Cerulean Blue                                   | $\text{Fe}_3(\text{PO}_4)_2 \cdot 8\text{H}_2\text{O}$                                                                         |
|                | Prussian Blue                                   | $\text{CoSnO}_3$                                                                                                               |
|                | Smalt                                           | $\text{Fe}_4[\text{Fe}(\text{CN})_6]_3 \cdot x\text{H}_2\text{O}$                                                              |
|                | Azurite                                         | contain Co                                                                                                                     |
|                | Cobalt Blue                                     | $2\text{CuCO}_3 \cdot \text{Cu}(\text{OH})_2$                                                                                  |
|                | Ultramarine                                     | $\text{CoAl}_2\text{O}_4$                                                                                                      |
| Red            | Pompeiiian Red                                  | $\text{Na}_7\text{Al}_6\text{Si}_6\text{O}_{24}\text{S}_3$                                                                     |
|                | Chrome Red                                      | Iron oxide + clay and quartz                                                                                                   |
|                | Cadmium Red                                     | $\text{PbO PbCrO}_4$                                                                                                           |
|                | Red Lead                                        | $\text{Cd}(\text{S,Se})$                                                                                                       |
|                | Red Ochre                                       | $\text{Pb}_3\text{O}_4$                                                                                                        |
|                | Vermilion                                       | Hematite (Iron oxide)                                                                                                          |
|                | Realgar                                         | $\text{HgS}$                                                                                                                   |
| Yellow         | Raw Sienna                                      | $\text{As}_4\text{S}_4$                                                                                                        |
|                | Bismuth Vanadate                                | Iron oxide + small amounts of Mn oxides                                                                                        |
|                | Yellow                                          | $\text{BiVO}_4$                                                                                                                |
|                | Zinc Yellow                                     | $\text{K}_2\text{O } 4\text{ZnCrO}_4(\text{H}_2\text{O})_3$                                                                    |
|                | Lemon Yellow                                    | $\text{BaCrO}_4$                                                                                                               |
|                | Cobalt Yellow                                   | $\text{K}_3[\text{Co}(\text{NO}_2)_6]$                                                                                         |
|                | Naples Yellow                                   | $\text{Pb}_3(\text{SbO}_4)_2$                                                                                                  |
|                | Cadmium Yellow                                  | $\text{CdS}$                                                                                                                   |
|                | Yellow Ochre                                    | Iron oxides                                                                                                                    |
|                | Orpiment                                        | $\text{As}_2\text{S}_3$                                                                                                        |
|                | Chrome Yellow                                   | $\text{PbCrO}_4$                                                                                                               |
|                | Lead-Tin Yellow                                 | $\text{Pb}_2\text{SnO}_4$                                                                                                      |
| Green          | Phthalocyanine Green                            | Cu organic complex                                                                                                             |
|                | Cobalt Titanate Green                           | $\text{Co}_2\text{TiO}_4$                                                                                                      |
|                | Verdigris                                       | $\text{Cu}(\text{CH}_3\text{COO})_2 \cdot \text{H}_2\text{O}$                                                                  |
|                | Green Earth                                     | $\text{K}[(\text{Al,Fe}^{\text{III}}),(\text{Fe}^{\text{II}},\text{Mg})](\text{AlSi}_3,\text{Si}_4)\text{O}_{10}(\text{OH})_2$ |
|                | Malachite                                       | $\text{CuCO}_3 \cdot \text{Cu}(\text{OH})_2$                                                                                   |
|                | Viridian                                        | $\text{Cr}_2\text{O}_3 \cdot 2 \text{H}_2\text{O}$                                                                             |
|                | Emerald Green                                   | $3 \text{Cu}(\text{AsO}_2)_2 \cdot \text{Cu}(\text{CH}_3\text{COO})_2$                                                         |
| Cadmium Green  | mix of $\text{CdS}$ and $\text{Cr}_2\text{O}_3$ |                                                                                                                                |
| Orange         | Antimony Orange                                 | $2 \text{Sb}_2\text{S}_3 \cdot \text{Sb}_2\text{O}_3$                                                                          |
|                | Cadmium Orange                                  | $\text{CdS}$                                                                                                                   |
|                | Chrome Orange                                   | $\text{PbO} \cdot \text{PbCrO}_4$                                                                                              |
|                | Orange Ochre                                    | Iron oxides                                                                                                                    |
|                | Realgar                                         | $\text{AsS}, \text{As}_2\text{S}_2$ or $\text{As}_4\text{S}_4$                                                                 |
| Grey and Black | Spinel black                                    | $\text{MnFe}_2\text{O}_4$                                                                                                      |
|                | Manganese Black                                 | Manganese and Iron oxides                                                                                                      |
| White          | Titanium Dioxide White                          | $\text{TiO}_2$                                                                                                                 |
|                | Calcite                                         | $\text{CaCO}_3$                                                                                                                |
|                | Zinc White                                      | $\text{ZnO}$                                                                                                                   |
|                | Lead White                                      | $2 \text{PbCO}_3 \cdot \text{Pb}(\text{OH})_2$                                                                                 |

Table S3 : Additive information from Hahladakis et al., 2018.

| Element | Use                                                                                                                                     |
|---------|-----------------------------------------------------------------------------------------------------------------------------------------|
| Al      | - Special effects (such as fluorescence).<br>- Flame retardant                                                                          |
| Zn      | - Inorganic pigments<br>- Fillers<br>- Flame retardant as zinc borate                                                                   |
| As      | - Biocides                                                                                                                              |
| Fe      | - Inorganic pigments                                                                                                                    |
| Mn      | - Inorganic pigments (cadmium-manganese based possible)                                                                                 |
| Cu      | - Special effect (such as fluorescence)                                                                                                 |
| Cr      | - Inorganic pigments                                                                                                                    |
| Ba      | - Fillers                                                                                                                               |
| Pb      | - Stabilisers, Antioxidants and UV stabilisers<br>- Heat stabilisers<br>- Inorganic pigments<br>- Special effect (such as fluorescence) |
| Cd      | - Stabilisers, Antioxidants and UV stabilisers<br>- Heat stabilisers<br>- Inorganic pigments                                            |
| Ca      | - Fillers                                                                                                                               |

Table S4: Summary of the results obtained by El Hadri (2020) from microplastics collected at the same sampling site measured by LC-ICP-MS. Two behaviours were identified in the samples: additive (Add) and sorbed (Sor)

| Colour | Orange | White   | Yellow  | Blue | Beige | Green | Grey |
|--------|--------|---------|---------|------|-------|-------|------|
| Cd     | Add    | Add/Sor | Add/Sor | Sor  | Add   | Add   | Sor  |
| As     | Sor    | Sor     | Sor     | Sor  | Sor   | Sor   | Sor  |
| Zn     | Sor    | Sor     | Add     | Add  | Add   | Add   | Sor  |
| Pb     | S      | Sor     | S       | Sor  | Sor   | Add   | Add  |



Table S5: Element concentrations measured after acid leaching and the lowest observed effect concentration (LOEC) determined for each element in this study. LOEC data is from the Internet database: <https://cfpub.epa.gov/ecotox/>

|                |                               | Fe   | Cu   | Zn   | As   | Cd          | Pb     |
|----------------|-------------------------------|------|------|------|------|-------------|--------|
| Blue           | [mg (kg pl.) <sup>-1</sup> ]  | 0.87 | 0.09 | 0.51 | 0.25 | 0.05        | 0.18   |
| Green          | [mg (kg pl.) <sup>-1</sup> ]  | 1.02 | 0.06 | 0.56 | 0.24 | <b>0.10</b> | 0.27   |
| Orange         | [mg (kg pl.) <sup>-1</sup> ]  | 1.94 | 0.06 | 0.57 | 0.24 | <b>0.33</b> | 0.04   |
| Red            | [mg (kg pl.) <sup>-1</sup> ]  | 0.22 | 0.04 | 0.32 | 0.37 | <b>0.42</b> | 0.00   |
| Yellow         | [mg (kg pl.) <sup>-1</sup> ]  | 0.52 | 0.04 | 0.38 | 0.12 | <b>0.29</b> | 0.04   |
| Grey and Black | [mg (kg pl.) <sup>-1</sup> ]  | 3.29 | 0.08 | 7.41 | 0.68 | 0.03        | 0.15   |
| White          | [mg (kg pl.) <sup>-1</sup> ]  | 0.38 | 0.07 | 0.43 | 0.57 | <b>0.10</b> | 0.00   |
| LOEC min       | [mg (kg food) <sup>-1</sup> ] | 560  | 0.28 | 100  | 28   | 0.07        | 7.20   |
| LOEC max       | [mg (kg food) <sup>-1</sup> ] | 560  | 1780 | 5926 | 732  | 615         | 802.92 |
